# Supplementary material for: Fundamental Fresh State Properties of Self‐Consolidating Concrete: A Meta‐Analysis of Mix Designs
Source: Hindawi journal article supplement (doi:10.1155/2018/5237230), 2018-01-01
Supplement: f1 [file 5237230.f1.docx]

SUPPLEMENTARY FILE

# Fundamental Properties of Self-Consolidating Concrete: A Meta-Analysis of Mix Designs

Emilio Garcia-Taengua1

1 School of Civil Engineering, University of Leeds, Leeds LS2 9JT, United Kingdom.

Correspondence should be addressed to: [e.garcia-taengua@leeds.ac.uk](mailto:e.garcia-taengua@leeds.ac.uk)

## Compilation of the Database: List of Sources

Abdel-Mohti, A., Shen, H. and Khodair, Y. 2016. Characteristics of self-consolidating concrete with RAP and SCM. Construction and Building Materials. 102,pp.564–573.

Abrishambaf, A., Barros, J.A.O. and Cunha, V.M.C.F. 2015. Tensile stress-crack width law for steel fibre reinforced self-compacting concrete obtained from indirect (splitting) tensile tests. Cement and Concrete Composites 57, pp.153–165.

Abukhashaba, M.I., Mostafa, M.A. and Adam, I.A. 2014. Behavior of self-compacting fiber reinforced concrete containing cement kiln dust. Alexandria Engineering Journal 53(2), pp.341–354.

Alberti, M.G., Enfedaque, A. and Gálvez, J.C. 2015. Comparison between polyolefin fibre reinforced vibrated conventional concrete and self-compacting concrete. Construction and Building Materials 85, pp.182–194.

Almeida Filho, F.M., Barragan, B.E., Casas, J.R. and El Debs, A.L.H.C. 2010. Hardened properties of self-compacting concrete - A statistical approach. Construction and Building Materials 24(9), pp.1608–1615.

Andiç-Çakir, Ö. and Hizal, S. 2012. Influence of elevated temperatures on the mechanical properties and microstructure of self consolidating lightweight aggregate concrete. Construction and Building Materials 34, pp.575–583.

Ashtiani, M.S., Dhakal, R.P. and Scott, A.N. 2013. Post-yield bond behaviour of deformed bars in high-strength self-compacting concrete. Construction and Building Materials 44, pp.236–248.

Aslani, F. and Nejadi, S. 2013. Self-compacting concrete incorporating steel and polypropylene fibers: Compressive and tensile strengths, moduli of elasticity and rupture, compressive stress-strain curve, and energy dissipated under compression. Composites Part B: Engineering 53, pp.121–133.

Assié, S., Escadeillas, G. and Waller, V. 2007. Estimates of self-compacting concrete ‘potential’ durability. Construction and Building Materials 21(10), pp.1909–1917.

Barluenga, G., Puentes, J. and Palomar, I. 2015. Early age monitoring of self-compacting concrete with mineral additions. Construction and Building Materials 77, pp.66–73.

Benaicha, M., Jalbaud, O., Roguiez, X., Hafidi Alaoui, A. and Burtschell, Y. 2015. Prediction of Self-Compacting Concrete homogeneity by ultrasonic velocity. Alexandria Engineering Journal 54(4), pp.1181–1191.

Beycioglu, A. and Yilmaz Aruntas, H. 2014. Workability and mechanical properties of selfcompacting concretes containing LLFA, GBFS and MC. Construction and Building Materials 73, pp.626–635.

Beygi, M.H.A., Kazemi, M.T., Nikbin, I.M. and Amiri, J.V. 2013. The effect of water to cement ratio on fracture parameters and brittleness of self-compacting concrete. Materials and Design 50, pp.267–276.

Beygi, M.H.A., Kazemi, M.T., Nikbin, I.M., Vaseghi Amiri, J., Rabbanifar, S. and Rahmani, E. 2014. The influence of coarse aggregate size and volume on the fracture behavior and brittleness of self-compacting concrete. Cement and Concrete Research 66, pp.75–90.

Bingöl, A.F. and Tohumcu, I. 2013. Effects of different curing regimes on the compressive strength properties of self compacting concrete incorporating fly ash and silica fume. Materials and Design 51, pp.12–18.

Boukendakdji, O., Kenai, S., Kadri, E.H. and Rouis, F. 2009. Effect of slag on the rheology of fresh self-compacted concrete. Construction and Building Materials 23(7), pp.2593–2598.

Castel, A., Vidal, T. and Fran??ois, R. 2010. Bond and cracking properties of self consolidating concrete. Construction and Building Materials 24(7), pp.1222–1231.

Corinaldesi, V. and Moriconi, G. 2004. Durable fiber reinforced self-compacting concrete. Cement and Concrete Research 34(2), pp.249–254.

Corinaldesi, V. and Moriconi, G. 2011. The role of industrial by-products in self-compacting concrete. Construction and Building Materials 25(8), pp.3181–3186.

Corinaldesi, V. and Moriconi, G. 2015. Use of synthetic fibers in self-compacting lightweight aggregate concretes. Journal of Building Engineering 4, pp.247–254.

Dehestani, M., Nikbin, I.M. and Asadollahi, S. 2014. Effects of specimen shape and size on the compressive strength of self-consolidating concrete (SCC). Construction and Building Materials 66, pp.685–691.

Dinakar, P., Kartik Reddy, M. and Sharma, M. 2013. Behaviour of self compacting concrete using Portland pozzolana cement with different levels of fly ash. Materials and Design 46, pp.609–616.

Dinakar, P., Sethy, K.P. and Sahoo, U.C. 2013. Design of self-compacting concrete with ground granulated blast furnace slag. Materials and Design 43, pp.161–169.

Ding, Y., Azevedo, C., Aguiar, J.B. and Jalali, S. 2012. Study on residual behaviour and flexural toughness of fibre cocktail reinforced self compacting high performance concrete after exposure to high temperature. Construction and Building Materials 26(1), pp.21–31.

Djelal, C., Vanhove, Y. and Magnin, A. 2004. Tribological behaviour of self compacting concrete. Cement and Concrete Research 34(5), pp.821–828.

Farokhzad, R., Mahdikhani, M., Bagheri, A. and Baghdadi, J. 2016. Representing a logical grading zone for self-consolidating concrete. Construction and Building Materials 115, pp.735–745.

Felekoǧlu, B. 2008. A comparative study on the performance of sands rich and poor in fines in self-compacting concrete. Construction and Building Materials 22(4), pp.646–654.

Felekoǧlu, B. and Sarikahya, H. 2008. Effect of chemical structure of polycarboxylate-based superplasticizers on workability retention of self-compacting concrete. Construction and Building Materials 22(9), pp.1972–1980.

Ferrara, L., Bamonte, P., Caverzan, A., Musa, A. and Sanal, I. 2012. A comprehensive methodology to test the performance of Steel Fibre Reinforced Self-Compacting Concrete (SFR-SCC). Construction and Building Materials 37, pp.406–424.

Floyd, R.W., Hale, W.M. and Bymaster, J.C. 2015. Effect of aggregate and cementitious material on properties of lightweight self-consolidating concrete for prestressed members. Construction and Building Materials 85, pp.91–99.

Frazao, C., Camoes, A., Barros, J. and Gonzalves, D. 2015. Durability of steel fiber reinforced self-compacting concrete. Construction and Building Materials 80, pp.155–166.

Gandage, A.S., Rao, V.R.V., Sivakumar, M.V.N., Vasan, A., Venu, M. and Yaswanth, A.B. 2013. Effect of Perlite on Thermal Conductivity of Self Compacting Concrete. Procedia -Social and Behavioral Sciences 104, pp.188–197.

Gesoǧlu, M., Güneyisi, E. and Özbay, E. 2009. Properties of self-compacting concretes made with binary, ternary, and quaternary cementitious blends of fly ash, blast furnace slag, and silica fume. Construction and Building Materials 23(5), pp.1847–1854.

Ghoddousi, P., Shirzadi Javid, A.A. and Sobhani, J. 2014. Effects of particle packing density on the stability and rheology of self-consolidating concrete containing mineral admixtures. Construction and Building Materials 53, pp.102–109.

Grabois, T.M., Cordeiro, G.C. and Filho, R.D.T. 2016. Fresh and hardened-state properties of self-compacting lightweight concrete reinforced with steel fibers. Construction and Building Materials 104, pp.284–292.

Granata, M.F. 2015. Pumice powder as filler of self-compacting concrete. Construction and Building Materials 96, pp.581–590.

Grdic, Z.J., Toplicic-Curcic, G.A., Despotovic, I.M. and Ristic, N.S. 2010. Properties of self compacting concrete prepared with coarse recycled concrete aggregate. Construction and Building Materials 24(7), pp.1129–1133.

Grünewald, S. and Walraven, J.C. 2001. Parameter-study on the influence of steel fibers and coarse aggregate content on the fresh properties of self-compacting concrete. Cement and Concrete Research 31(12), pp.1793–1798.

Güneyisi, E., Gesoğlu, M., Algın, Z. and Yazıcı, H. 2014. Effect of surface treatment methods on the properties of self-compacting concrete with recycled aggregates. Construction and Building Materials 64, pp.172–183.

Güneyisi, E., Gesoʇlu, M., Booya, E. and Mermerdaş, K. 2015. Strength and permeability properties of self-compacting concrete with cold bonded fly ash lightweight aggregate. Construction and Building Materials 74, pp.17–24.

Guru Jawahar, J., Sashidhar, C., Ramana Reddy, I. V. and Annie Peter, J. 2013. Design of cost-effective M 25 grade of self compacting concrete. Materials and Design 49, pp.687–692.

Guru Jawahar, J., Sashidhar, C., Ramana Reddy, I. V. and Annie Peter, J. 2013. Effect ofcoarse aggregate blending on short-term mechanical properties of self compactingconcrete. Materials and Design 43, pp.185–194.

Hassan, A.A.A., Hossain, K.M.A. and Lachemi, M. 2010. Strength, cracking and deflectionperformance of large-scale self-consolidating concrete beams subjected to shear failure. Engineering Structures 32(5), pp.1262–1271.

Hassan, A.A.A., Ismail, M.K. and Mayo, J. 2015. Mechanical properties of self-consolidating concrete containing lightweight recycled aggregate in different mixture compositions. Journal of Building Engineering 4, pp.113–126.

Heirman, G., Vandewalle, L., Van Gemert, D., Boel, V., Audenaert, K., De Schutter, G., Desmet, B. and Vantomme, J. 2008. Time-dependent deformations of limestone powder type self-compacting concrete. Engineering Structures 30(10), pp.2945–2956.

Helincks, P., Boel, V., De Corte, W., De Schutter, G. and Desnerck, P. 2013. Structural behaviour of powder-type self-compacting concrete: Bond performance and shear capacity. Engineering Structures 48, pp.121–132.

Hossain, K.M.A., Lachemi, M., Sammour, M. and Sonebi, M. 2013. Strength and fracture energy characteristics of self-consolidating concrete incorporating polyvinyl alcohol, steel and hybrid fibres. Construction and Building Materials 45, pp.20–29.

Hunger, M., Entrop, A.G., Mandilaras, I., Brouwers, H.J.H. and Founti, M. 2009. The behavior of self-compacting concrete containing micro-encapsulated Phase Change Materials. Cement and Concrete Composites 31(10), pp.731–743.

Iqbal, S., Ali, A., Holschemacher, K. and Bier, T.A. 2015. Mechanical properties of steel fiber reinforced high strength lightweight self-compacting concrete (SHLSCC). Construction and Building Materials 98, pp.325–333.

Jalal, M., Pouladkhan, A., Harandi, O.F. and Jafari, D. 2015. Comparative study on effects of Class F fly ash, nano silica and silica fume on properties of high performance self compacting concrete. Construction and Building Materials 94, pp.90–104.

Kanellopoulos, A., Petrou, M.F. and Ioannou, I. 2012. Durability performance of selfcompacting concrete. Construction and Building Materials 37, pp.320–325.

Khalil, E., Abd-Elmohsen, M. and Anwar, A.M. 2015. Impact Resistance of Rubberized Self-Compacting Concrete. Water Science 29(1), pp.45–53.

Khaloo, A., Raisi, E.M., Hosseini, P. and Tahsiri, H. 2014. Mechanical performance of selfcompacting concrete reinforced with steel fibers. Construction and Building Materials 51,pp.179–186.

Kou, S.C. and Poon, C.S. 2009. Properties of self-compacting concrete prepared with coarse and fine recycled concrete aggregates. Cement and Concrete Composites 31(9), pp.622–627.

Kou, S.C. and Poon, C.S. 2009. Properties of self-compacting concrete prepared with recycled glass aggregate. Cement and Concrete Composites 31(2), pp.107–113.

Kristiawan, S.A. and Aditya, M.T.M. 2015. Effect of High Volume Fly Ash on Shrinkage of Self-compacting Concrete. Procedia Engineering 125, pp.705–712.

Lachemi, M. 2001. Self Compacting Concrete Incorporating High-Volumes of Class F Fly Ash : Preliminary Results. Cement and Concrete Research 31(3), pp.413–420.

Lameiras, R., Barros, J.A.O. and Azenha, M. 2015. Influence of casting condition on the anisotropy of the fracture properties of Steel Fibre Reinforced Self-Compacting Concrete (SFRSCC). Cement and Concrete Composites 59, pp.60–76.

Le, H.T., Muller, M., Siewert, K. and Ludwig, H.M. 2015. Corrigendum to ‘The mix design for self-compacting high performance concrete containing various mineral admixtures’, [Mater. Des., 72, (2015), 51-62] Materials and Design 74, p.164.

Li, Y. and Li, J. 2014. Capillary tension theory for prediction of early autogenous shrinkage of self-consolidating concrete. Construction and Building Materials 53, pp.511–516.

Liu, M. 2010. Self-compacting concrete with different levels of pulverized fuel ash. Construction and Building Materials 24(7), pp.1245–1252.

Long, G., Gao, Y. and Xie, Y. 2015. Designing more sustainable and greener self compacting concrete. Construction and Building Materials 84, pp.301–306.

Lotfy, A., Hossain, K.M.A. and Lachemi, M. 2015. Statistical models for the development of optimized furnace slag lightweight aggregate self-consolidating concrete. Cement and Concrete Composites 55, pp.169–185.

Lu, C., Yang, H. and Mei, G. 2015. Relationship between slump flow and rheological properties of self compacting concrete with silica fume and its permeability. Construction and Building Materials 75, pp.157–162.

Lu, H., Zhao, X.-L. and Han, L.-H. 2009. Fire behaviour of high strength self-consolidating concrete filled steel tubular stub columns. Journal of Constructional Steel Research. 65(10–11), pp.1995–2010.

Madandoust, R., Ranjbar, M.M., Ghavidel, R. and Fatemeh Shahabi, S. 2015. Assessment of factors influencing mechanical properties of steel fiber reinforced self-compacting concrete. Materials and Design 83, pp.284–294.

Madandoust, R., Ranjbar, M.M. and Yasin Mousavi, S. 2011. An investigation on the fresh properties of self-compacted lightweight concrete containing expanded polystyrene. Construction and Building Materials 25(9), pp.3721–3731.

Maia, L., Figueiras, H., Nunes, S., Azenha, M. and Figueiras, J. 2012. Influence of shrinkage reducing admixtures on distinct SCC mix compositions. Construction and Building Materials 35, pp.304–312.

Mardani-Aghabaglou, A., Tuyan, M., Yilmaz, G., Ariöz, Ö. and Ramyar, K. 2013. Effect of different types of superplasticizer on fresh, rheological and strength properties of self consolidating concrete. Construction and Building Materials 47, pp.1020–1025.

Mashhadban, H., Kutanaei, S.S. and Sayarinejad, M.A. 2016. Prediction and modeling of mechanical properties in fiber reinforced self-compacting concrete using particle swarm optimization algorithm and artificial neural network. Construction and Building Materials 119, pp.277–287.

Mastali, M. and Dalvand, A. 2016. The impact resistance and mechanical properties of self compacting concrete reinforced with recycled CFRP pieces. Composites Part B: Engineering 92, pp.360–376.

Mazaheripour, H., Ghanbarpour, S., Mirmoradi, S.H. and Hosseinpour, I. 2011. The effect of polypropylene fibers on the properties of fresh and hardened lightweight self compacting concrete. Construction and Building Materials 25(1), pp.351–358.

Mendes, P.J.D., Barros, J.A.O., Sena-Cruz, J. and Teheri, M. 2014. Influence of fatigue and aggressive exposure on GFRP girder to SFRSCC deck all-adhesive connection. Composite Structures 110(1), pp.152–162.

Mir, A. El and Nehme, S.G. 2015. Porosity of Self-compacting Concrete. Procedia Engineering 123, pp.145–152.

Mohammed, M.K., Dawson, A.R. and Thom, N.H. 2014. Macro/micro-pore structure characteristics and the chloride penetration of self-compacting concrete incorporating different types of filler and mineral admixture. Construction and Building Materials. 72, pp.83–93.

Naik, T.R., Kumar, R., Ramme, B.W. and Canpolat, F. 2012. Development of high-strength, economical self-consolidating concrete. Construction and Building Materials 30, pp.463–469.

Nikbin, I.M., Beygi, M.H.A., Kazemi, M.T., Vaseghi Amiri, J., Rabbanifar, S., Rahmani, E. and Rahimi, S. 2014. A comprehensive investigation into the effect of water to cement ratio and powder content on mechanical properties of self-compacting concrete. Construction and Building Materials 57, pp.69–80

Paja̧ k, M. and Ponikiewski, T. 2013. Flexural behavior of self-compacting concrete reinforced with different types of steel fibers. Construction and Building Materials 47, pp.397–408.

Pereira-De-Oliveira, L.A., Nepomuceno, M.C.S., Castro-Gomes, J.P. and Vila, M.F.C. 2014. Permeability properties of self-Compacting concrete with coarse recycled aggregates. Construction and Building Materials 51, pp.113–120.

Persson, B. 2003. Internal frost resistance and salt frost scaling of self-compacting concrete. Cement and Concrete Research 33(3), pp.373–379.

Ponikiewski, T., Gołaszewski, J., Rudzki, M. and Bugdol, M. 2015. Determination of steel fibres distribution in self-compacting concrete beams using X-ray computed tomography. Archives of Civil and Mechanical Engineering 15(2), pp.558–568.

Pop, I., Schutter, G. De, Desnerck, P. and Onet, T. 2013. Bond between powder type self compacting concrete and steel reinforcement. Construction and Building Materials 41, pp.824–833.

Pozolo, A. and Andrawes, B. 2011. Analytical prediction of transfer length in prestressed self-consolidating concrete girders using pull-out test results. Construction and Building Materials 25(2), pp.1026–1036.

Al Qadi, A.N.S. and Al-Zaidyeen, S.M. 2014. Effect of fibre content and specimen shape on residual strength of polypropylene fibre self-compacting concrete exposed to elevated temperatures. Journal of King Saud University - Engineering Sciences 26(1), pp.33–39.

Rahal, K.N., Khaleefi, A.L. and Al-Sanee, A. 2016. An experimental investigation of shear transfer strength of normal and high strength self compacting concrete. Engineering Structures 109, pp.16–25.

Rambo, D.A.S., Silva, F.D.A. and Toledo Filho, R.D. 2014. Effect of steel fiber hybridization on the fracture behavior of self-consolidating concretes. Cement and Concrete Composites 54, pp.100–109.

Ranjbar, M.M., Madandoust, R., Mousavi, S.Y. and Yosefi, S. 2013. Effects of natural zeolite on the fresh and hardened properties of self-compacted concrete. Construction and Building Materials 47, pp.806–813.

Sadrmomtazi, A., Dolati-Milehsara, S., Lotfi-Omran, O. and Sadeghi-Nik, A. 2014. The combined effects of waste Polyethylene Terephthalate (PET) particles and pozzolanic materials on the properties of self-compacting concrete. Journal of Cleaner Production, 112 (2016), pp.2363-2373.

Şahmaran, M., Christianto, H.A. and Yaman, I.O. 2006. The effect of chemical admixtures and mineral additives on the properties of self-compacting mortars. Cement and Concrete Composites 28(5), pp.432–440.

Sahmaran, M. and Yaman, I.O. 2007. Hybrid fiber reinforced self-compacting concrete with a high-volume coarse fly ash. Construction and Building Materials 21(1), pp.150–156.

Sahmaran, M., Yurtseven, A. and Ozgur Yaman, I. 2005. Workability of hybrid fiber reinforced self-compacting concrete. Building and Environment 40(12), pp.1672–1677.

Saleh Ahari, R., Erdem, T.K. and Ramyar, K. 2015. Time-dependent rheological characteristics of self-consolidating concrete containing various mineral admixtures. Construction and Building Materials 88, pp.134–142.

Salehian, H. and Barros, J.A.O. 2015. Assessment of the performance of steel fibre reinforced self-compacting concrete in elevated slabs. Cement and Concrete Composites 55, pp.268–280.

Santos, A.C.P., Ortiz-Lozano, J.A., Villegas, N. and Aguado, A. 2015. Experimental study about the effects of granular skeleton distribution on the mechanical properties of self compacting concrete (SCC). Construction and Building Materials 78, pp.40–49.

Sfikas, I.P., Kanellopoulos, A., Trezos, K.G. and Petrou, M.F. 2013. Durability of similar self compacting concrete batches produced in two different EU laboratories. Construction and Building Materials 40, pp.207–216.

Sfikas, I.P. and Trezos, K.G. 2013. Effect of composition variations on bond properties of Self-Compacting Concrete specimens. Construction and Building Materials 41, pp.252–262.

Shan, Z., Yu, Z. and Shi, J. 2015. Experimental investigation of flow of fresh self-compacting concrete in improved L-box. Construction and Building Materials 84, pp.30–38.

Shen, L., Bahrami Jovein, H., Sun, Z., Wang, Q. and Li, W. 2015. Testing dynamic segregation of self-consolidating concrete. Construction and Building Materials. 75, pp.465–471.

Siddique, R. 2011. Properties of self-compacting concrete containing class F fly ash. Materials and Design 32(3), pp.1501–1507.

Siddique, R., Kaur, G. and Kunal 2016. Strength and permeation properties of self compacting concrete containing fly ash and hooked steel fibres. Construction and Building Materials 103, pp.15–22.

Sideris, K.K. and Anagnostopoulos, N.S. 2013. Durability of normal strength self-compacting concretes and their impact on service life of reinforced concrete structures. Construction and Building Materials 41, pp.491–497.

Da Silva, P.R. and De Brito, J. 2015. Experimental study of the porosity and microstructure of self-compacting concrete (SCC) with binary and ternary mixes of fly ash and limestone filler. Construction and Building Materials 86, pp.101–112.

Soleymani Ashtiani, M., Scott, A.N. and Dhakal, R.P. 2013. Mechanical and fresh properties of high-strength self-compacting concrete containing class C fly ash. Construction and Building Materials 47, pp.1217–1224.

Sonebi, M. 2004. Medium strength self-compacting concrete containing fly ash: Modelling using factorial experimental plans. Cement and Concrete Research 34(7), pp.1199–1208.

Spitek, R.K. 2011. Influence of limestone powder content and size on transport properties of self-consolidating concrete. Construction and Building Materials 127, p.272.

Tennich, M., Kallel, A. and Ben Ouezdou, M. 2015. Incorporation of fillers from marble and tile wastes in the composition of self-compacting concretes. Construction and Building Materials 91,pp.65–70.

Torrijos, M.C., Barragan, B.E. and Zerbino, R.L. 2008. Physical-mechanical properties, and mesostructure of plain and fibre reinforced self-compacting concrete. Construction and Building Materials 22(8), pp.1780–1788.

Trezos, K.G., Sfikas, I.P. and Orfanopoulos, K. 2014. Bond of self-compacting concrete incorporating silica fume: Top-bar effect, effects of rebar distance from casting point and of rebar-to-concrete relative displacements during setting. Construction and Building Materials 73, pp.378–390.

Trezos, K.G., Sfikas, I.P. and Pasios, C.G. 2014. Influence of water-to-binder ratio on topbar effect and on bond variation across length in Self-Compacting Concrete specimens. Cement and Concrete Composites 48, pp.127–139.

Tuyan, M., Mardani-Aghabaglou, A. and Ramyar, K. 2014. Freeze-thaw resistance, mechanical and transport properties of self-consolidating concrete incorporating coarse recycled concrete aggregate. Materials and Design 53, pp.983–991.

Valcuende, M., Benito, F., Parra, C. and Minano, I. 2015. Shrinkage of self-compacting concrete made with blast furnace slag as fine aggregate. Construction and Building Materials 76, pp.1–9.

Valcuende, M., Marco, E., Parra, C. and Serna, P. 2012. Influence of limestone filler and viscosity-modifying admixture on the shrinkage of self-compacting concrete. Cement and Concrete Research 42(4), pp.583–592.

Valcuende, M. and Parra, C. 2009. Bond behaviour of reinforcement in self-compacting concretes. Construction and Building Materials 23(1), pp.162–170.

Valcuende, M. and Parra, C. 2010. Natural carbonation of self-compacting concretes. Construction and Building Materials 24(5), pp.848–853.

Van Der Vurst, F., Desnerck, P., Peirs, J. and De Schutter, G. 2014. Shape factors of self compacting concrete specimens subjected to uniaxial loading. Cement and Concrete Composites 54, pp.62–69.

Wu, Z., Zhang, Y., Zheng, J. and Ding, Y. 2009. An experimental study on the workability of self-compacting lightweight concrete. Construction and Building Materials 23(5), pp.2087–2092.

Yakhlaf, M., Safiuddin, M. and Soudki, K.A. 2013. Properties of freshly mixed carbon fibre reinforced self-consolidating concrete. Construction and Building Materials 46, pp.224–231.

Yazici, H. 2008. The effect of silica fume and high-volume Class C fly ash on mechanical properties, chloride penetration and freeze-thaw resistance of self-compacting concrete. Construction and Building Materials. 22(4), pp.456–462.

Yehia, S., Douba, A.E., Abdullahi, O. and Farrag, S. 2016. Mechanical and durability evaluation of fiber-reinforced self-compacting concrete. Construction and Building Materials 121, pp.120–133.

You, Z., Chen, X. and Dong, S. 2011. Ductility and strength of hybrid fiber reinforced self consolidating concrete beam with low reinforcement ratios. Systems Engineering Procedia 1, pp.28–34.

Zhao, H., Sun, W., Wu, X. and Gao, B. 2012. Effect of initial water-curing period and curing condition on the properties of self-compacting concrete. Materials and Design 35, pp. 194–200.

Zhao, H., Sun, W., Wu, X. and Gao, B. 2015. The properties of the self-compacting concretewith fly ash and ground granulated blast furnace slag mineral admixtures. Journal of Cleaner Production 95, pp.66–74.

Zhu, M., Liu, J., Wang, Q. and Feng, X. 2010. Experimental research on square steel tubular columns filled with steel-reinforced self-consolidating high-strength concrete under axial load. Engineering Structures 32(8),pp.2278–2286.

Zhu, S.Z., Zhang, Y.X., Jin, G.F. and DesMarteau, D.D. 2003. Synthesis and characterization of a novel perfluorinated ionomer polymer containing sulfonimide functionality. Chinese Journal of Chemistry. 21(7),pp.921–925.
